# Supplementary material for: PPARα Ligand-Binding Domain Structures with Endogenous Fatty Acids and Fibrates
Source: PubMed Central journal article supplement — iScience. 2020 Oct 23;23(11):101727. doi: 10.1016/j.isci.2020.101727 (PMC7653058; doi:10.1016/j.isci.2020.101727), 2020-10-23
Supplement: mmc1.pdf [file mmc1.pdf]

iScience, Volume 23

## Supplemental Information

### PPAR $\alpha$ Ligand-Binding Domain Structures

### with Endogenous Fatty Acids and Fibrates

Shotaro Kamata, Takuji Oyama, Kenta Saito, Akihiro Honda, Yume Yamamoto, Keisuke Suda, Ryo Ishikawa, Toshimasa Itoh, Yasuo Watanabe, Takahiro Shibata, Koji Uchida, Makoto Suematsu, and Isao Ishii

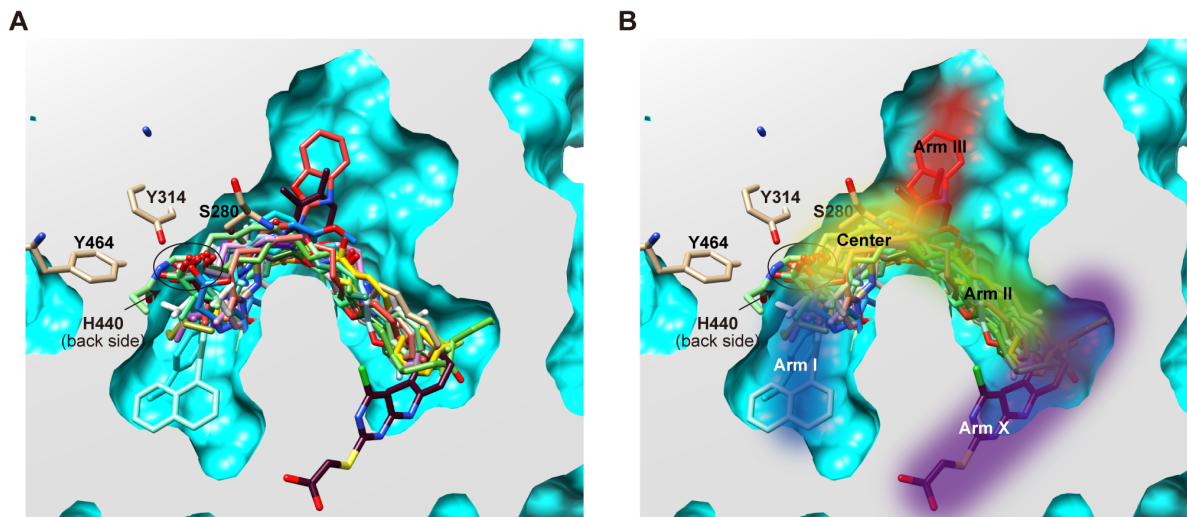

**Figure S1. Twenty-one PPAR $\alpha$  ligands located in PPAR $\alpha$ -LBD, Related to Figures 1–4**

(A) Twenty-one PPAR $\alpha$  ligands, including 20 agonists and 1 antagonist, located in PPAR $\alpha$ -LBD in the PDB registered crystal structures. (B) Five regions of PPAR $\alpha$ -LBD (Arm I–III and X, and Center). A binding site for carboxylic residues common to PPAR $\alpha$  ligands (*circled*) is surrounded by four amino acids (S280, Y314, H440, and Y464) and located between Arm I and Center regions. Pemaifibrate is located deep in Arm III with its benzoxazole ring (*red*) (Kawasaki *et al.*, 2020), and one of the two Wy14643 molecules is found to be located in Arm X (Bernardes *et al.*, 2013). Only two ligands, 2-methyl-2-[4-(naphthalen-1-yl)phenoxy]propanoic acid and (2S,3S)-1-(4-methoxyphenyl)-3-(3-(2-(5-methyl-2-phenyloxazol-4-yl)ethoxy)benzyl)-4-oxoazetidine-2-carboxylic acid (65W and REW, respectively, in Table S1), are located in Arm I.

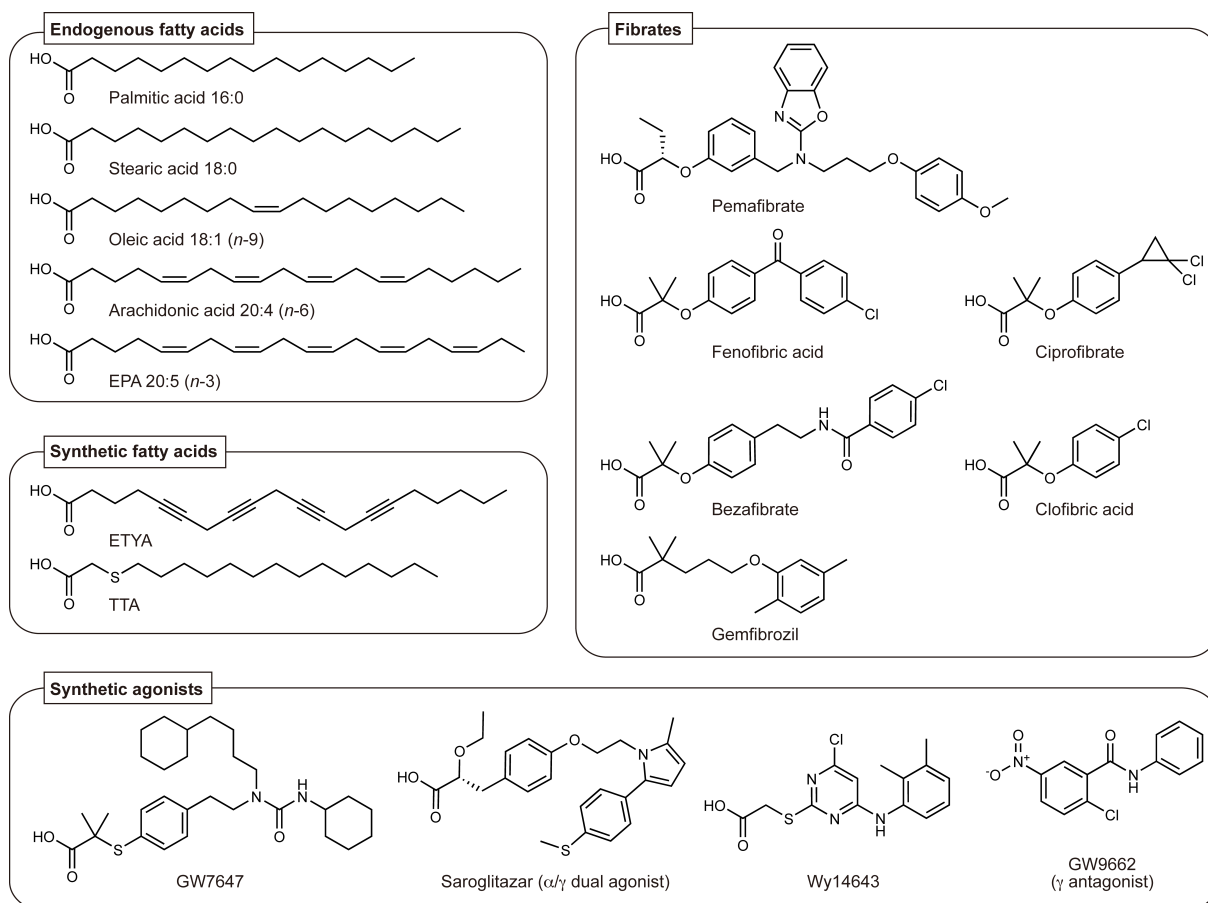

**Figure S2. Chemical structures of 17 PPAR $\alpha$  ligands analyzed in this study, Related to Figure 1**

Five endogenous fatty acids, including EPA, two synthetic fatty acids (ETYA, 5,8,11,14-eicosatetraynoic acid [arachidonic acid mimetic]; TTA, tetradecylthioacetic acid, which is a PPAR pan agonist), six clinically approved fibrates, and four synthetic agonists, including saroglitazar, which is a PPAR $\alpha/\gamma$  dual agonist, and GW9662, which is a PPAR $\gamma$ -selective antagonist.

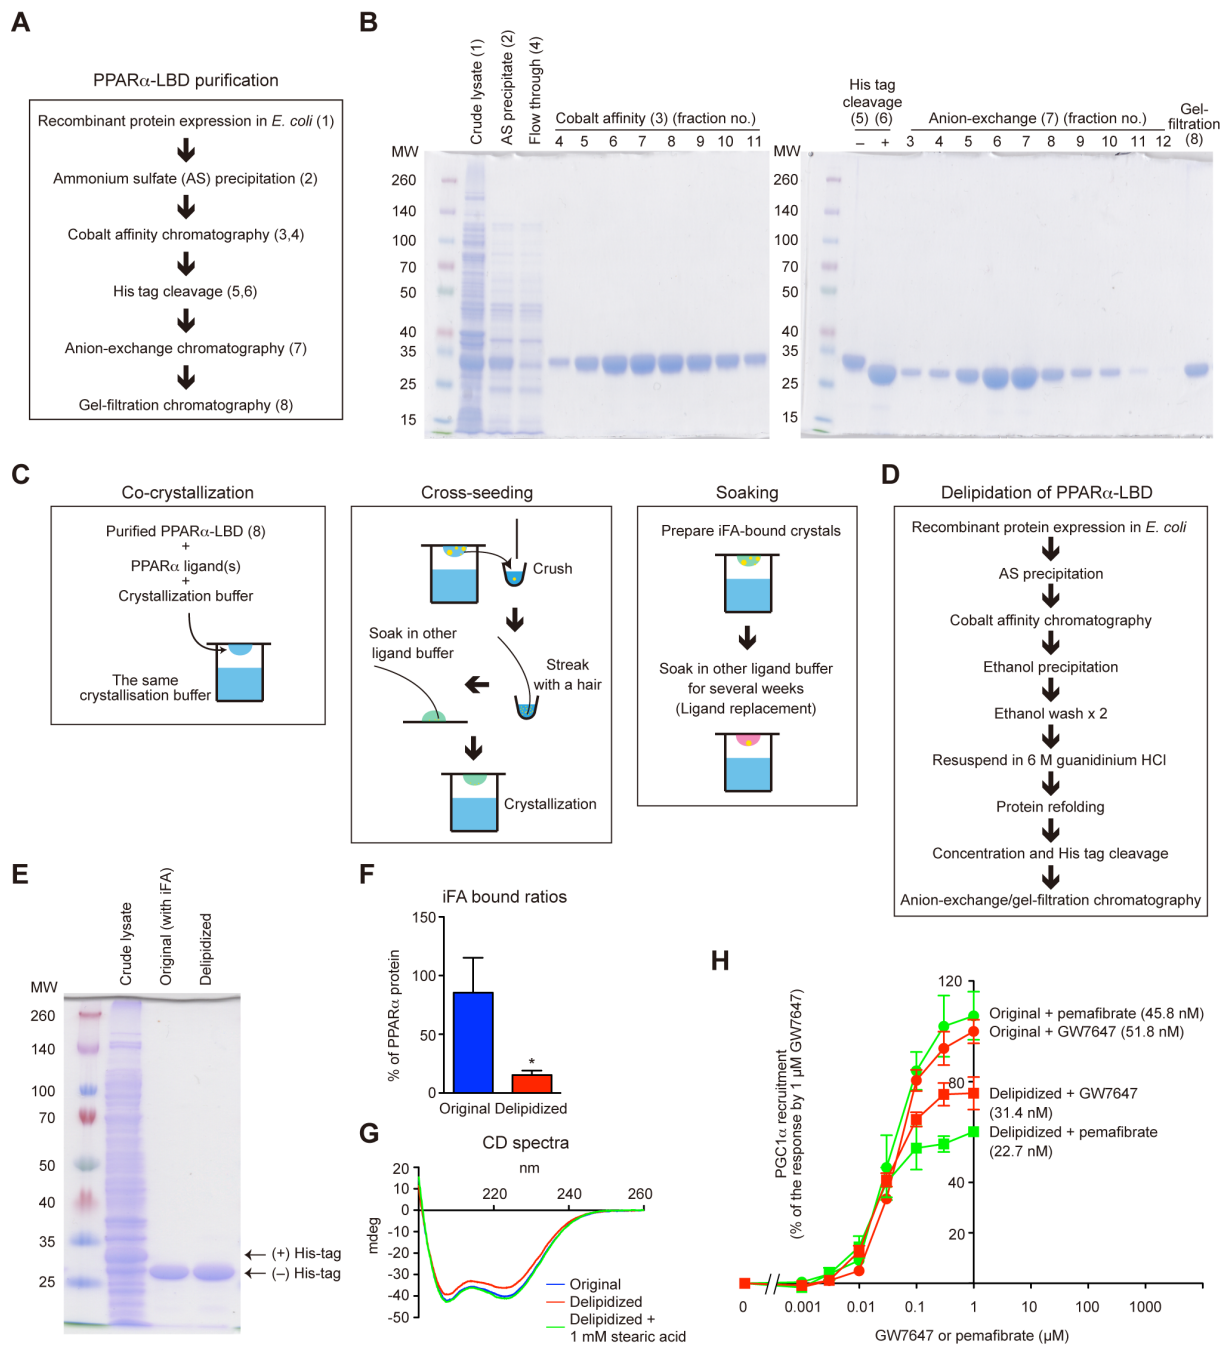

**Figure S3. Methods for purification, delipidation, and crystallization of human PPAR $\alpha$ -LBD proteins, and a functional assay of delipidized proteins, Related to Figure 1**

(A, B) Methods (A) and SDS-PAGE gel check (B) of three-step chromatography for PPAR $\alpha$ -LBD purification. (C) The different crystal preparation methods used in this study: co-crystallization, cross-seeding, and soaking. (D) Delipidation procedures to remove intrinsic fatty acid (iFA). (E) SDS-PAGE gel check of delipidized PPAR $\alpha$ -LBD. (F–H) Comparative analyses of original and delipidized PPAR $\alpha$ -LBD using iFA-bound ratios (F), circular dichroism (CD) spectra (G), PPAR $\alpha$  activation (PGC1 $\alpha$  recruitment) by agonists (H). The difference is significant ( $P < 0.05$ ) in (F). Stearic acid supplementation (1 mM) restored the CD spectrum shift by delipidation in (G). Similar EC<sub>50</sub> values (in parentheses) were obtained from pemafibrate/GW7647 concentration-dependent activation of original (iFA-bound) and delipidized PPAR $\alpha$ -LBD proteins.

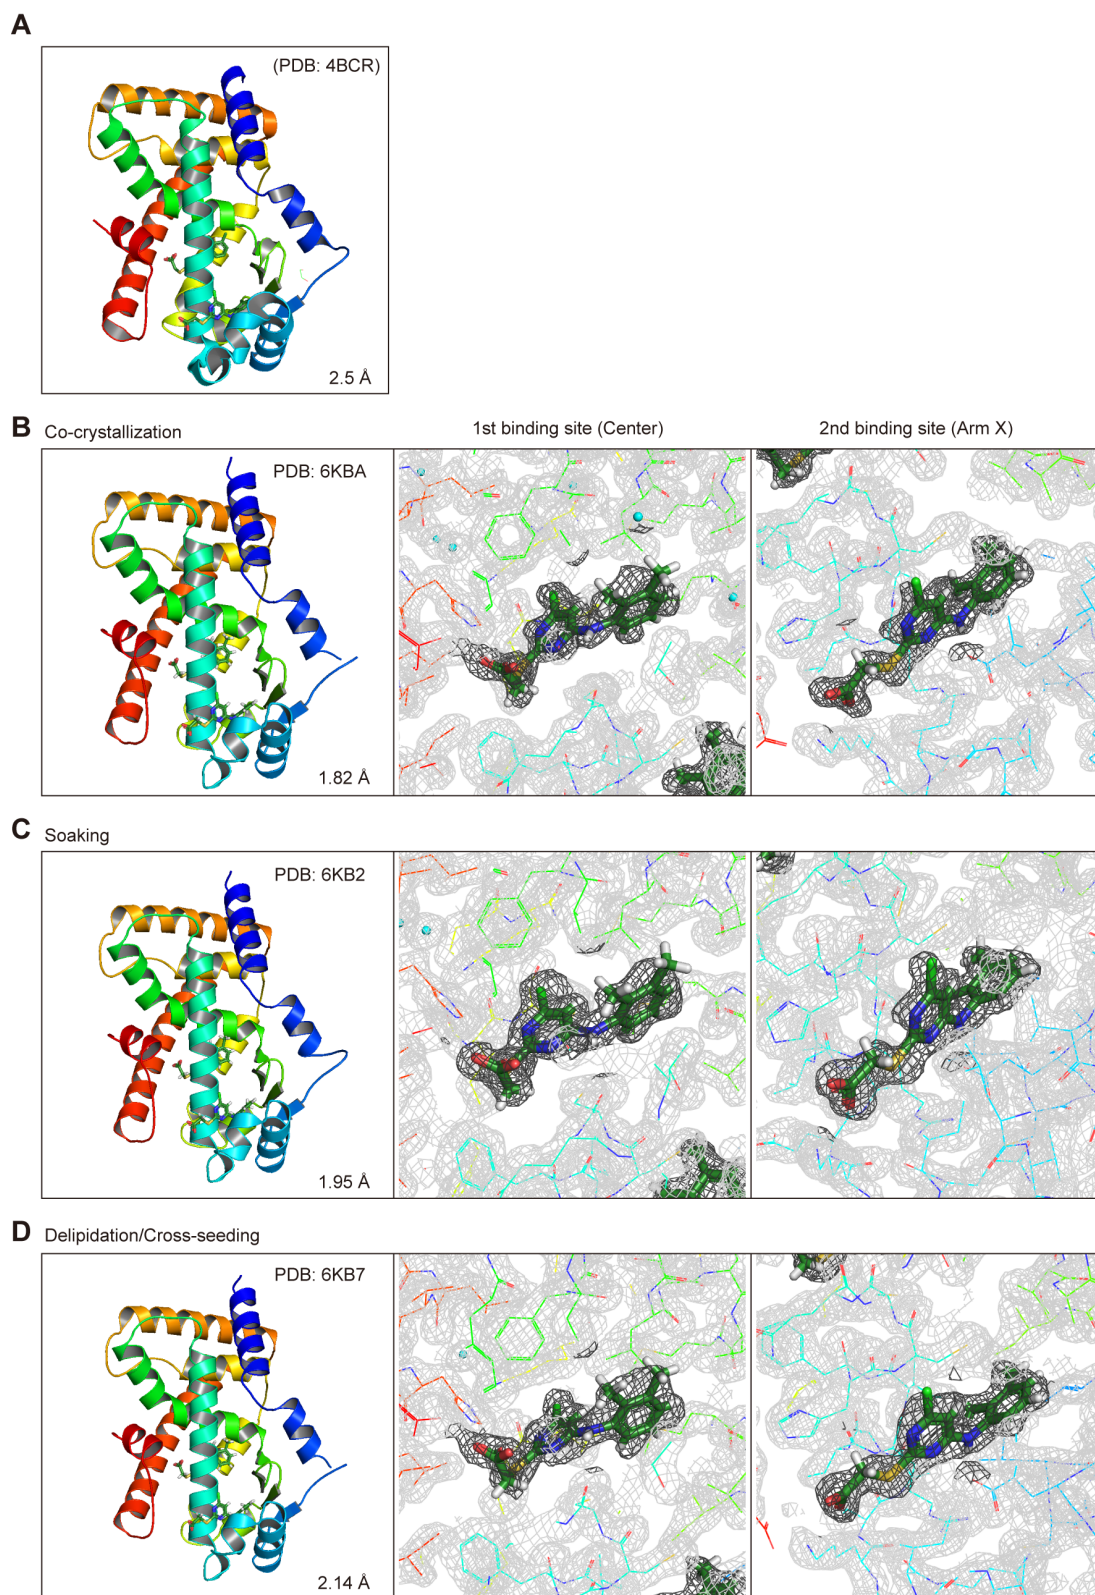

**Figure S4. Crystal structures of PPAR $\alpha$ -LBD bound to two Wy14643 molecules by different crystal preparation methods, Related to Figure 1**

(A) PDB (ID: 4BCR): Deposited Wy14643 ( $\times 2$ )-bound structure deposited (Bernardes *et al.*, 2013). (B–D) Overall structures and magnified views of two Wy14643 binding sites, located in the Center and Arm X regions, in crystals obtained using co-crystallization (B), soaking (C), or delipidation/cross-seeding (D) procedures. The electron density is shown in the mesh using Feature Enhanced Maps (FEMs) contoured at  $1.0\sigma$ . PDB identities and resolutions are labelled, and water molecules are presented as cyan spheres.

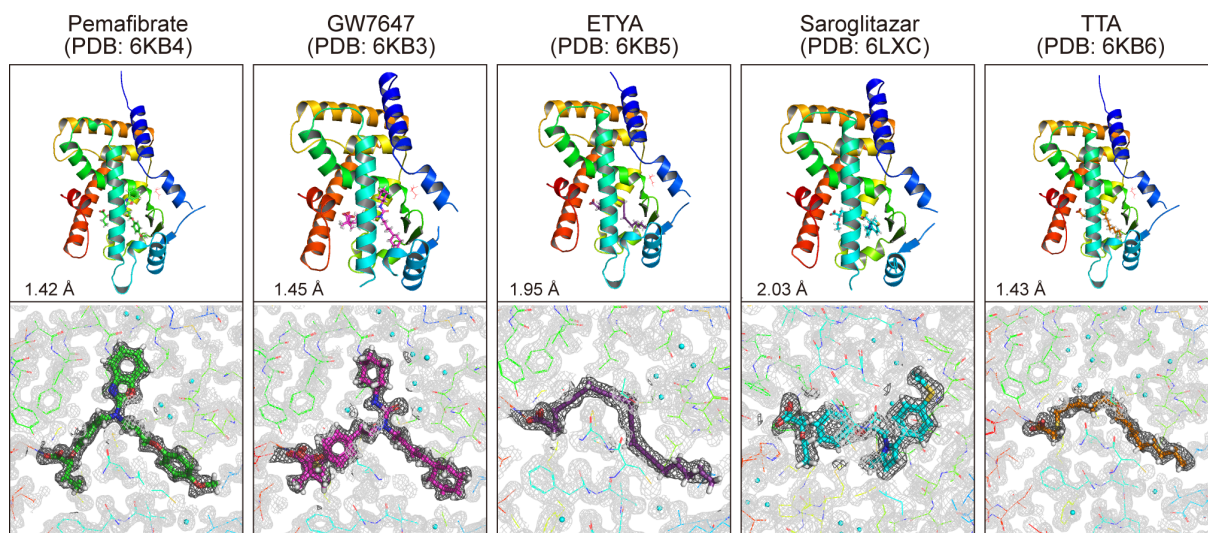

**Figure S5. Crystal structures and magnified views of PPAR $\alpha$ -LBD and five potent PPAR $\alpha$  agonists obtained using cross-seeding of the delipidized proteins, Related to Figure 2**

The electron density is shown in the mesh by FEMs contoured at  $1.0\sigma$ . PDB identities and resolutions are labelled, and water molecules are presented as cyan spheres.

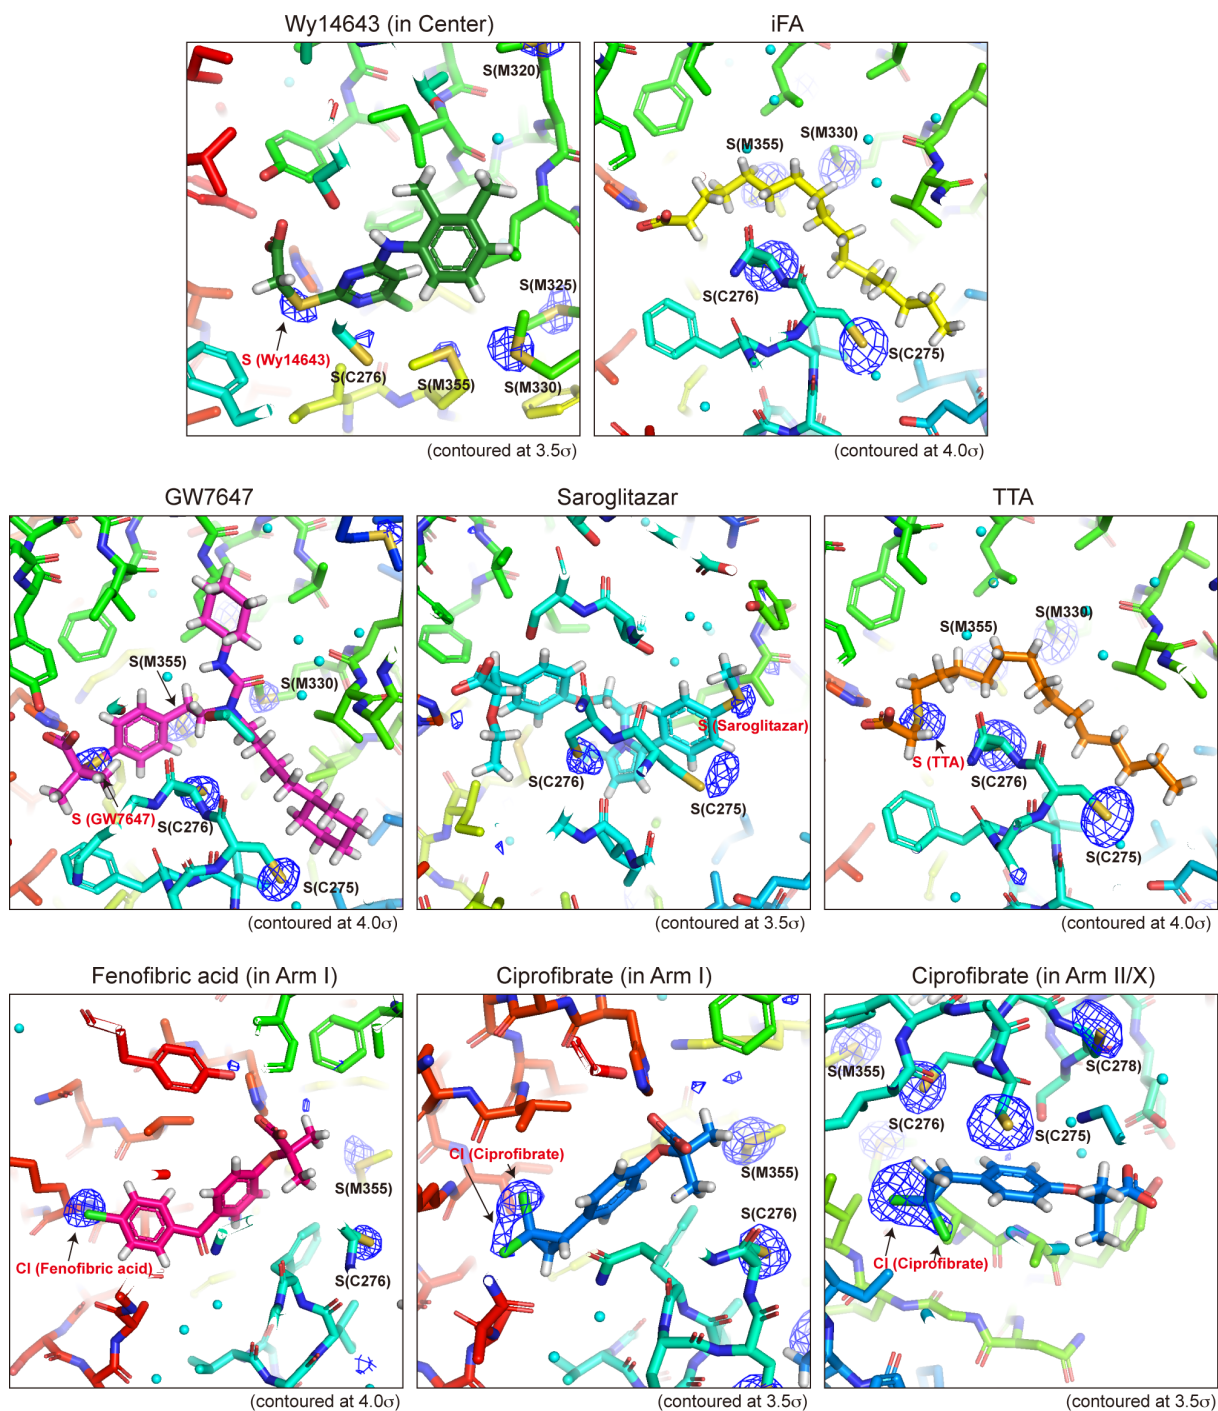

**Figure S6. Magnified views of PPAR $\alpha$ -LBD–ligand structures superimposed with sulfur/chloride signals located using anomalous difference Fourier maps, Related to Figure 2**

PPAR $\alpha$  agonists, such as Wy14643, GW7647, saroglitazar, and TTA, but not intrinsic fatty acid, have been found to possess single sulfur atoms in their molecules, which are detectable using anomalous difference Fourier maps, contoured at  $3.5\sigma$  or  $4.0\sigma$ , conducted with  $1.8 \text{ \AA}$  X-ray. Chloride signals in fenofibric acid and ciprofibrate were also detected. The electron density is shown in the mesh, and water molecules are presented as cyan spheres. The locations of all the sulfur/chloride signals correspond to the signals revealed by routine  $1.0 \text{ \AA}$  X-ray crystallography.

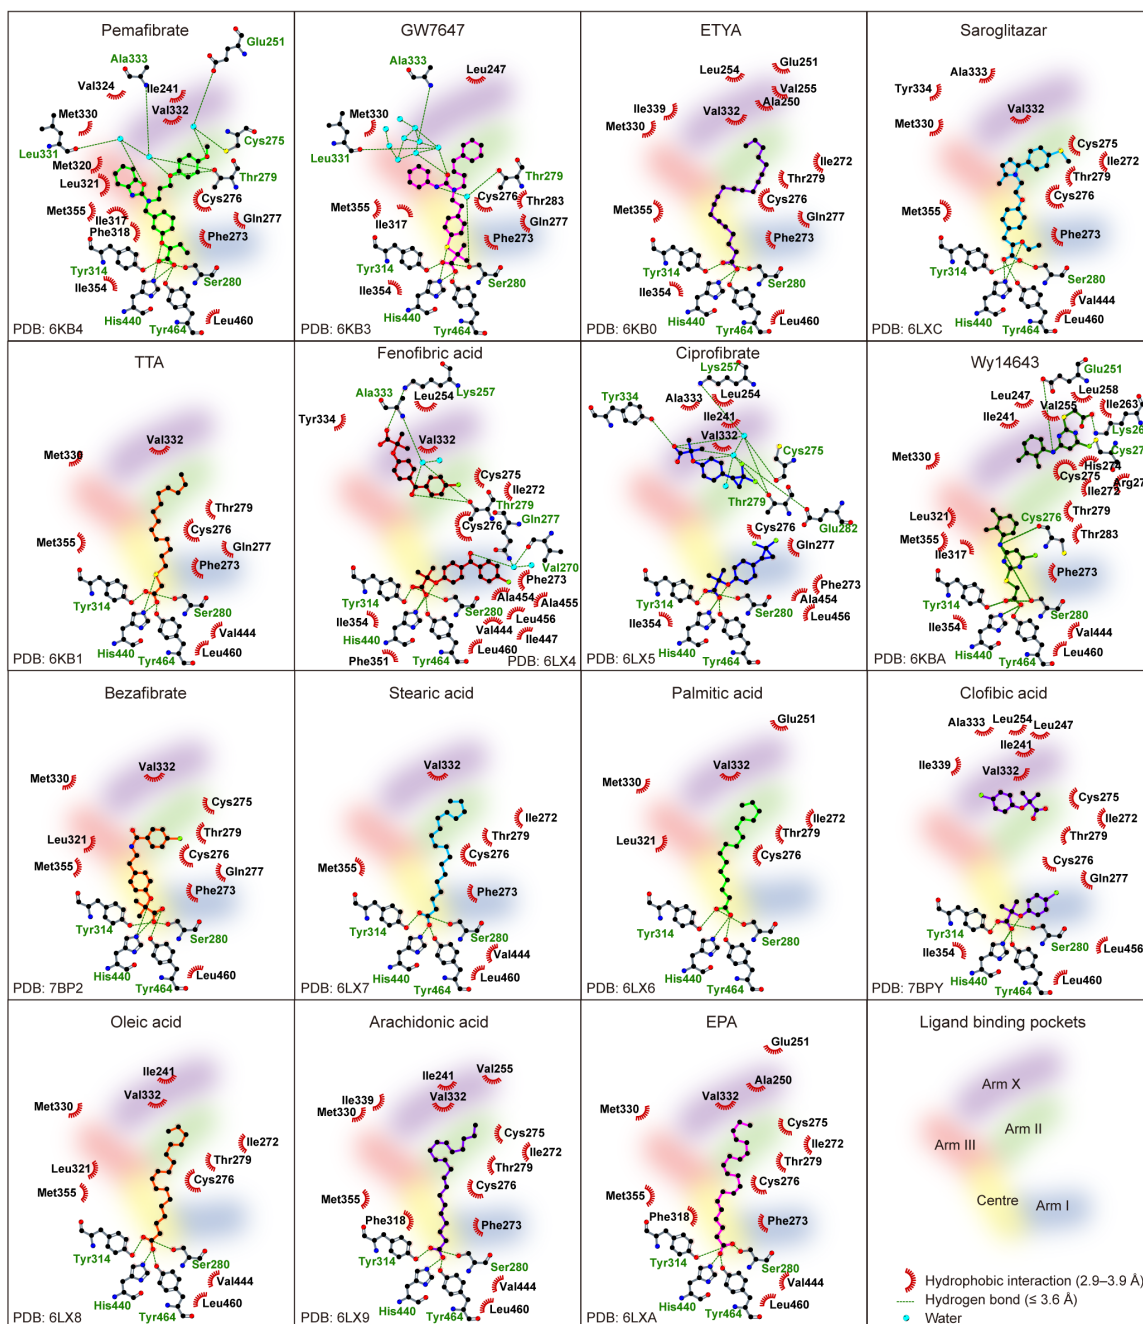

**Figure S7. Interatomic interaction of 15 ligands with PPAR $\alpha$ -LBDs, Related to Figures 2 and 3**  
 Conserved hydrogen bonds, including those between the carboxyl groups of ligands and their surrounding S280, Y314, H440, and Y464 residues in Arm I/Center boundary, are illustrated by green dashed lines. All plots were generated using LigPlot+.



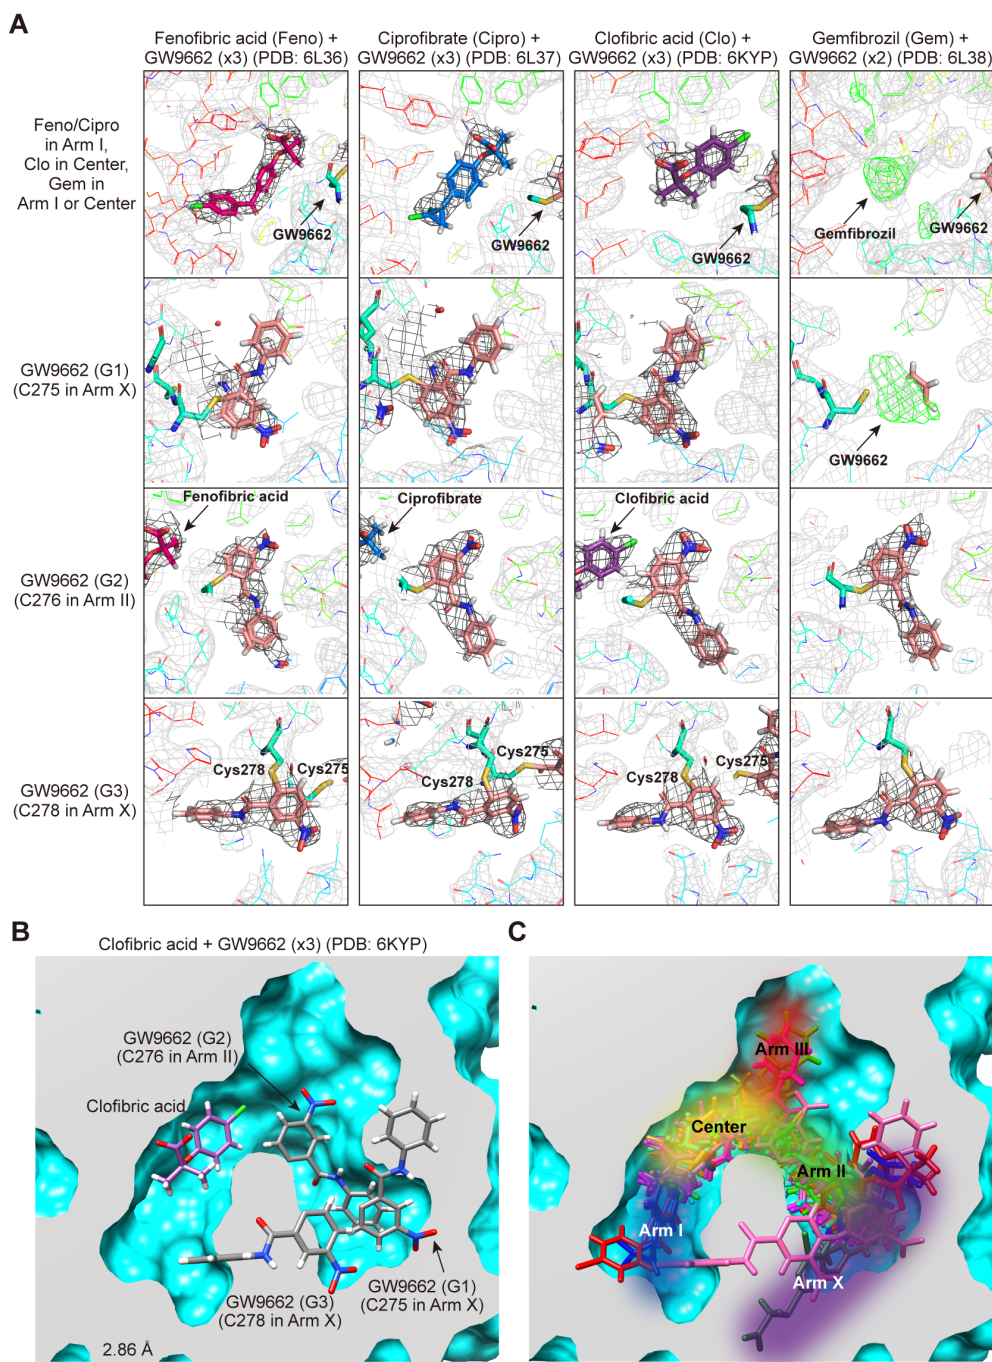

**Figure S8. Magnified views of crystal structures of PPAR $\alpha$ -LBD with fibrates and GW9662 and enlarged LBD spaces by this study, Related to Figure 4**

(A) Fenofibric acid and ciprofibrate are located at Arm I (two sites, Arm I and II/X boundary, in the absence of GW9662), whereas three GW9662 are located at Arm II and X; one molecule is covalently bound to Cys276 in Arm II, and two molecules are covalently bound to Cys275 and Cys278 in Arm X. Clofibrac acid is located at the Center or at Arm I in the absence of GW9662, and three GW9662 are located similarly. Although no crystals were obtained with gemfibrozil alone, crystals with combinations of gemfibrozil and GW9662 were acquired. Only unclear electron densities of gemfibrozil, in the Center, and single GW9662 molecule, attached to Cys275, were obtained, but two GW9662 were covalently bound to Cys276 in Arm II and Cys275 in Arm X, explicitly. The electron density is shown in the black mesh using FEMs contoured at  $1.0\sigma$  and in the green mesh, only for gemfibrozil crystals, using  $Fo-Fc$  omit maps contoured at  $3.0\sigma$ . (B) A magnified view of PPAR $\alpha$ -LBD bound with clofibrac acid/GW9662 ( $\times 3$ ). (C) Enlarged PPAR $\alpha$ -LBD spaces from the results of this study. Original spaces for four Arms and Center regions (the same in Figure S1B) are illustrated.

**Table S1. Twenty-one PPAR $\alpha$ -LBD X-ray crystal structures deposited so far in the Protein Data Bank (PDB) to date, Related to Table 1**

| PDB ID               | Resolution | Ligand(s)           | Publication                                                               | Released date |
|----------------------|------------|---------------------|---------------------------------------------------------------------------|---------------|
| <a href="#">3VI8</a> | 1.75 Å     | <a href="#">13M</a> | <a href="#">J. Med. Chem. 55, 893–902 (2012)</a>                          | 2012/8/29     |
| <a href="#">2P54</a> | 1.79 Å     | <a href="#">735</a> | <a href="#">J. Med. Chem. 50, 685–695 (2007)</a>                          | 2007/4/24     |
| <a href="#">5HYK</a> | 1.83 Å     | <a href="#">65W</a> | <a href="#">Sci. Rep. 6, 34792 (2016)</a>                                 | 2016/11/23    |
| <a href="#">6KXX</a> | 1.95 Å     | <a href="#">T02</a> | <a href="#">Sci. Rep. 10, 4623 (2020)</a>                                 | 2020/5/20     |
| <a href="#">6KXY</a> | 2.00 Å     | <a href="#">T06</a> | <a href="#">Sci. Rep. 10, 4623 (2020)</a>                                 | 2020/5/20     |
| <a href="#">2ZNN</a> | 2.01 Å     | <a href="#">S44</a> | <a href="#">Acta Crystallogr. D Biol. Crystallogr. 65, 786–795 (2009)</a> | 2009/5/5      |
| <a href="#">3KDU</a> | 2.07 Å     | <a href="#">NKS</a> | <a href="#">J. Med. Chem. 53, 2854–2864 (2010)</a>                        | 2010/4/28     |
| <a href="#">1I7G</a> | 2.2 Å      | <a href="#">AZ2</a> | <a href="#">Structure 9, 699–706 (2001)</a>                               | 2002/3/9      |
| <a href="#">3G8I</a> | 2.2 Å      | <a href="#">RO7</a> | <a href="#">Bioorg. Med. Chem. Lett. 19, 2468–2473 (2009)</a>             | 2009/6/2      |
| <a href="#">3SP6</a> | 2.21 Å     | <a href="#">IL2</a> | <a href="#">J. Biol. Chem. 286, 31473–31479 (2011)</a>                    | 2011/7/20     |
| <a href="#">2NPA</a> | 2.3 Å      | <a href="#">MMB</a> | <a href="#">Bioorg. Med. Chem. Lett. 17, 937–941 (2007)</a>               | 2007/10/30    |
| <a href="#">4C14</a> | 2.3 Å      | <a href="#">Y1N</a> | <a href="#">J. Struct. Biol. 191, 332–340 (2015)</a>                      | 2014/12/24    |
| <a href="#">2REW</a> | 2.35 Å     | <a href="#">REW</a> | Not published                                                             | 2007/11/27    |
| <a href="#">3FEI</a> | 2.4 Å      | <a href="#">CTM</a> | <a href="#">ChemMedChem 4, 951–956 (2009)</a>                             | 2009/10/20    |
| <a href="#">1K7L</a> | 2.5 Å      | <a href="#">544</a> | <a href="#">Proc. Natl. Acad. Sci. USA 98, 13919–13924 (2001)</a>         | 2001/12/5     |
| <a href="#">3ET1</a> | 2.5 Å      | <a href="#">ET1</a> | <a href="#">Proc. Natl. Acad. Sci. USA 106, 262–267 (2009)</a>            | 2009/2/17     |
| <a href="#">4BCR</a> | 2.5 Å      | <a href="#">WY1</a> | <a href="#">J. Mol. Biol. 425, 2878 (2013)</a>                            | 2013/5/29     |
| <a href="#">3KDT</a> | 2.7 Å      | <a href="#">7HA</a> | <a href="#">J. Med. Chem. 53, 2854–2864 (2010)</a>                        | 2010/4/28     |
| <a href="#">1KKQ</a> | 3.0 Å      | <a href="#">471</a> | <a href="#">Nature 415, 813–817 (2002)</a>                                | 2002/2/20     |
| <a href="#">6L96</a> | 3.20 Å     | <a href="#">P7F</a> | <a href="#">Int. J. Mol. Sci. 21, 361 (2020)</a>                          | 2020/1/6      |
| <a href="#">5AZT</a> | 3.45 Å     | <a href="#">4M5</a> | <a href="#">ACS Chem.Biol. 11, 2447–2455 (2016)</a>                       | 2016/7/6      |

Data are ordered by the highest resolutions of crystal structures.

## TRANSPARENT METHODS

### Key Resources Table

| REAGENT or RESOURCE                           | SOURCE                         | IDENTIFIER                     |
|-----------------------------------------------|--------------------------------|--------------------------------|
| Antibodies                                    |                                |                                |
| Eu-W1024-labelled anti-6×His antibody         | PerkinElmer                    | Cat#AD0205; RRID: AB_2811261   |
| Bacterial and Virus Strains                   |                                |                                |
| <i>Escherichia coli</i> Rosetta (DE3) pLysS   | Novagen                        | Cat#70956                      |
| Biological Samples                            |                                |                                |
| Human blood                                   | This paper                     | N/A                            |
| Chemicals, Peptides, and Recombinant Proteins |                                |                                |
| Polyethyleneimine                             | Fujifilm-Wako                  | Cat#167-11951; CAS: 9002-98-6  |
| d <sub>33</sub> -Oleic acid                   | Cambridge Isotope Laboratories | Cat#DLM-1891-PK                |
| Polyethylene glycol (PEG) 3,350               | Hampton Research               | Cat#HR2-144; CAS: 25322-68-3   |
| SRC1 pentadecenoyl peptide (LTERHKILHRLQEG)   | GenScript                      | N/A                            |
| GW7647                                        | Cayman Chemical                | Cat#10008613; CAS: 265129-71-3 |
| Bezafibrate                                   | Cayman Chemical                | Cat#10009145; CAS: 41859-67-0  |
| Tetradecylthioacetic Acid                     | Fujifilm-Wako                  | Cat#209-18141; CAS: 2921-20-2  |
| Wy14643                                       | Cayman Chemical                | Cat#70730; CAS: 50892-23-4     |
| GW9662                                        | Cayman Chemical                | Cat#70785; CAS: 22978-25-2     |
| Ciprofibrate                                  | Fujifilm-Wako                  | Cat#033-21191; CAS: 52214-84-3 |
| Fenofibric acid                               | Combi-Blocks                   | Cat#OR-1173; CAS: 42017-89-0   |
| 5, 8, 11, 14-Icosatetraynoic Acid             | Cayman Chemical                | Cat#90120; CAS: 1191-85-1      |
| Icosapentaenoic Acid                          | Cayman Chemical                | Cat#90110; CAS: 10417-94-4     |
| Clofibrilic Acid                              | LKT Labs                       | Cat#C4556; CAS: 882-09-7       |
| Gemfibrozil                                   | Combi-Blocks                   | Cat#OR-0524; CAS: 25812-30-0   |
| Arachidonic acid                              | Cayman Chemical                | Cat#10006607; CAS: 6610-25-9   |
| Pemafibrate                                   | Chemscene                      | Cat# CS-6084; CAS: 848259-27-8 |
| Saroglitazar                                  | Chemscene                      | Cat# CS-6149; CAS: 495399-09-2 |
| Myristic acid                                 | Nacalai Tesque                 | Cat#23517-82; CAS: 544-63-8    |
| Palmitic acid                                 | Sigma-Aldrich                  | Cat#P0500-10G; CAS: 57-10-3    |
| Stearic acid                                  | Sigma-Aldrich                  | Cat#S4751-1G; CAS: 57-11-4     |
| Oleic acid                                    | Nacalai Tesque                 | Cat#25630-51; CAS: 112-80-1    |
| Linoleic acid                                 | Nacalai Tesque                 | Cat#20513-41; CAS: 60-33-3     |
| α-Linolenic acid                              | Cayman Chemical                | Cat#90210; CAS: 463-40-1       |
| Vaccenic Acid                                 | Sigma-Aldrich                  | Cat#V1131-100MG; CAS: 693-72-1 |

|                                                                   |                             |                                                                                                                                            |
|-------------------------------------------------------------------|-----------------------------|--------------------------------------------------------------------------------------------------------------------------------------------|
| Biotin-labelled PGC1 $\alpha$ peptides (biotin-EAEEPSLLKLLAPANTQ) | GenScript                   | N/A                                                                                                                                        |
| ULight-Streptavidin                                               | PerkinElmer                 | Cat#TRF0102                                                                                                                                |
| Critical Commercial Assays                                        |                             |                                                                                                                                            |
| NEFA C-test Wako                                                  | Fujifilm-Wako               | Cat#279-75401                                                                                                                              |
| AMP+ mass spectrometry kit                                        | Cayman Chemical             | Cat#710000                                                                                                                                 |
| Crystal Screen                                                    | Hampton Research            | Cat#HR2-110                                                                                                                                |
| Crystal Screen 2                                                  | Hampton Research            | Cat#HR2-112                                                                                                                                |
| Index                                                             | Hampton Research            | Cat#HR2-144                                                                                                                                |
| PrimeSTAR mutagenesis basal kit                                   | Takara Bio                  | Cat#R046A                                                                                                                                  |
| Deposited Data                                                    |                             |                                                                                                                                            |
| 34 novel hPPAR $\alpha$ -LBD structures in this study             | Protein Data Bank (PDB)     | Table 1                                                                                                                                    |
| 21 hPPAR $\alpha$ -LBD structures so far deposited in PDB         | Protein Data Bank (PDB)     | Table S1                                                                                                                                   |
| Recombinant DNA                                                   |                             |                                                                                                                                            |
| pET28a encoding human PPAR $\alpha$ residues 200–468              | Oyama et al., 2009          | N/A                                                                                                                                        |
| Software and Algorithms                                           |                             |                                                                                                                                            |
| XDS v-Jan 26 2018 or Mar 15 2019                                  | Kabsch, 2010                | <a href="http://xds.mpimf-heidelberg.mpg.de/">http://xds.mpimf-heidelberg.mpg.de/</a> ; RRID: SCR_015652                                   |
| Aimless v-0.5.21                                                  | Evans & Murshudov, 2013     | <a href="https://www.ccp4.ac.uk/">https://www.ccp4.ac.uk/</a> ; RRID: SCR_015747                                                           |
| Phaser v-2.7.6                                                    | McCoy et al., 2007          | <a href="https://www.ccp4.ac.uk/">https://www.ccp4.ac.uk/</a> ; RRID: SCR_014219                                                           |
| Phenix v-1.11.1-2575-000                                          | Adams et al., 2010          | <a href="https://www.phenix-online.org/">https://www.phenix-online.org/</a> ; RRID: SCR_014224                                             |
| Coot v-0.8.2                                                      | Emsley & Cowtan, 2004       | <a href="https://www.ccp4.ac.uk/">https://www.ccp4.ac.uk/</a> ; RRID: SCR_014222                                                           |
| PyMOL v-1.8.x                                                     | Schrodinger                 | <a href="https://pymol.org/2/">https://pymol.org/2/</a> ; RRID: SCR_000305                                                                 |
| UCSF Chimera v-1.10.2                                             | Pettersen et al., 2004      | <a href="https://www.cgl.ucsf.edu/chimera/">https://www.cgl.ucsf.edu/chimera/</a> ; RRID: SCR_004097                                       |
| LigPlot+ v-1.4.5                                                  | Laskowski & Swindells, 2011 | <a href="https://www.ebi.ac.uk/thornton-srv/software/LigPlus/">https://www.ebi.ac.uk/thornton-srv/software/LigPlus/</a> ; RRID: SCR_018249 |
| GraphPad Prism v-5.0c                                             | GraphPad Software           | <a href="https://www.graphpad.com/scientific-software/prism/">https://www.graphpad.com/scientific-software/prism/</a> ; RRID: SCR_002798   |
| Other                                                             |                             |                                                                                                                                            |
| TALON Metal Affinity Resin                                        | Clontech                    | Cat#635682                                                                                                                                 |
| HiTrap Q                                                          | GE Healthcare               | Cat#17115301                                                                                                                               |
| HiLoad 16/600 Superdex 75 pg gel-filtration column                | GE Healthcare               | Cat#28989333                                                                                                                               |
| Slide-A-Lyzer G2 Dialysis Cassette                                | Thermo Fisher               | Cat#87735                                                                                                                                  |
| Develosil HB-C30-UG 3 $\mu$ m column, 100 $\times$ 2.0 mm         | Nomura Chemical             | Cat#HBUG173201001                                                                                                                          |

### PPAR $\alpha$ -LBD expression and purification

Human PPAR $\alpha$ -LBD (amino acids 200–468) was expressed as an amino-terminal His-tagged protein from a pET28a vector (Novagen) in Rosetta (DE3) pLysS competent cells (Novagen) and was purified by three-step chromatography (Capelli *et al.*, 2016; Oyama *et al.*, 2009) with some modifications. Transformed cells were cultured in LB medium (with 15  $\mu$ g/ml kanamycin and 34  $\mu$ g/ml chloramphenicol) at 30 °C, and 50 mL of overnight culture was seeded in 1 L of TB medium (with 15  $\mu$ g/ml kanamycin), which was cultured at 30 °C for 1.5 h and then at 15 °C for 2 h. Protein overexpression was induced by adding 0.5 mM isopropyl  $\beta$ -D-galactopyranoside, which was later cultured at 15 °C for 48 h. The cells were harvested and resuspended in 40

mL buffer A (20 mM Tris-HCl (pH 8.0), 150 mM NaCl, 1 mM Tris 2-carboxyethylphosphine (TCEP)-HCl, and 10% glycerol) containing a cOmplete EDTA-free protease inhibitor (Sigma-Aldrich). The cells were then lysed by sonication for 2 min five times at an output of 8 with a UD-201 sonicator (Tomy, Tokyo, Japan) and clarified using centrifugation at 12,000 g, for 20 min, at 4 °C (the same conditions were used subsequently unless otherwise noted), and polyethyleneimine was added with a final concentration of 0.15% (v/v) to the supernatant in order to remove nucleic acids. After centrifugation, 35 ml of the supernatant was mixed with 20 g of ammonium sulfate at 4 °C for 30 min using gentle rotation. After centrifugation, the pellet was resuspended in 30 mL of buffer B, which was buffer A plus 10 mM imidazole. The suspension was loaded on a cobalt-based immobilized metal affinity column (TALON Metal Affinity Resin, Clontech), equilibrated with buffer B, and eluted with a linear gradient of 10–100 mM imidazole. The PPAR $\alpha$ -LBD-containing elutes (e.g., fraction nos. 5–10 in Figure S3B, left) were incubated with 33 U/ml thrombin protease (Nacalai Tesque, Kyoto, Japan) to cleave His tag and, at the same time, dialyzed against buffer A overnight at 4 °C using a Slide-A-Lyzer G2 Dialysis Cassette (20-kDa cutoff, Thermo Fisher Scientific). Then, the sample was later dialyzed against buffer C, which was buffer A minus 150 mM NaCl, at 4 °C for 3 h. The sample was then loaded onto a HiTrap Q anion-exchange column (GE Healthcare), equilibrated with buffer C, and eluted with a linear gradient of 0–150 mM NaCl. The elutes (e.g., fraction nos. 6–7 in Figure S3B, right) were loaded onto a HiLoad 16/600 Superdex 75 pg gel-filtration column (GE Healthcare), equilibrated with buffer A, and eluted with buffer A. The purity of human PPAR $\alpha$ -LBD was continuously analyzed using SDS-PAGE and Coomassie Brilliant Blue staining (Figure S3B).

#### **Measurement of fatty acid contents in PPAR $\alpha$ -LBD and human serum**

The total free fatty acid levels in PPAR $\alpha$ -LBD proteins were measured using the NEFA C-test Wako for *in vitro* diagnosis (Fujifilm-Wako, Osaka, Japan). To analyze their contents, a 10  $\mu$ l aliquot of PPAR $\alpha$ -LBD proteins (20 mg/ml) was transferred to a clean glass tube containing 100 pmol d33-oleic acid as an internal standard. Lipids were extracted using Bligh & Dyer methods (Bligh & Dyer, 1959). Then 30  $\mu$ l of chloroform/methanol (1:2, v/v) was added and mixed well. Next, 10  $\mu$ l of chloroform and then 10  $\mu$ l of water were added to the samples, which were mixed well, and centrifuged at 3,000 g, for 5 min, at room temperature. Then, the lower organic phase was transferred to another glass tube and dried under a stream of argon gas. Free fatty acids were derivatized with *N*-(4-aminomethylphenyl)pyridinium (AMPP) using a AMP+ mass spectrometry kit (Cayman Chemical) as previously reported (Bollinger *et al.*, 2013). Briefly, the samples were resuspended in 5  $\mu$ l ice-cold acetonitrile/dimethylformamide (4:1, v/v), and the following reagents were added: 5  $\mu$ l of 640 mM 1-ethyl-3-( $\epsilon$ -dimethylaminopropyl)carbodiimide in water, 2.5  $\mu$ l of 20 mM *N*-hydroxybenzotriazole in acetonitrile/dimethylformamide 99:1, and 7.5  $\mu$ l of 20 mM AMPP in acetonitrile. Then, the samples were mixed, incubated at 60 °C for 30 min, and analyzed on the same day.

The collection and lipid analyses of blood/serum were approved (no. 2019-5) by the Ethics Committee of Showa Pharmaceutical University with informed consent from all participants, and personal information was blinded to the experimenters. For the analysis of fatty acid contents in human serum, 8  $\mu$ l aliquot of serum was transferred to a clean glass tube. Reagents were added to each tube: 2  $\mu$ l of 4 mM d33-oleic acid, as an internal standard, 90  $\mu$ l of water, 200  $\mu$ l of chloroform, and 400  $\mu$ l of methanol. The samples were mixed well. Then, 200  $\mu$ l of chloroform and later 300  $\mu$ l of water were added, mixed well, and centrifuged at 3,000 g, for 5 min, at room temperature. The lower organic phase was transferred to another glass tube and dried under a stream of argon gas.

Fatty acids in human plasma were also derivatized using the mass spectrometry kit. The samples were resuspended in 30  $\mu$ l of ice-cold acetonitrile/dimethylformamide (4:1, v/v), and 20  $\mu$ l of 640 mM 1-ethyl-3-( $\epsilon$ -dimethylamino-propyl)carbodiimide in water, 10  $\mu$ l of 20 mM *N*-hydroxybenzotriazole in acetonitrile/dimethylformamide 99:1, and 20  $\mu$ l of 20 mM AMPP in acetonitrile were added. The samples were briefly mixed, incubated at 60 °C for 30 min, and analyzed on the same day.

Mass spectrometric analyses were performed using a Waters Xevo TQD triple quadrupole mass spectrometer interfaced to an ACQUITY ultra-performance liquid chromatography (UPLC) system (Waters). UPLC was carried out using a reverse-phase C30 column (Develosil HB-C30-UG 3- $\mu$ m column, 100  $\times$  2.0 mm, Nomura Chemical, Aichi, Japan). Solvent A was water containing 0.1% formic acid, and solvent B was acetonitrile containing 0.1% formic acid. The solvent program included linear gradients: 40% of solvent B at 0 min, 99% of solvent B at 8–10 min, and 40% of solvent B at 10.1 min. The flow rate was 0.3 ml/min, and the column temperature was set at 40 °C. Selected reaction monitoring (SRM) was performed in the positive ion mode using nitrogen as the nebulizing gas. The monitored SRM transitions were as follows: myristic acid,  $m/z$  395.0 > 239.0; palmitic acid,  $m/z$  423.0 > 239.0; stearic acid,  $m/z$  451.0 > 239.0; oleic acid,  $m/z$  449.0 > 239.0; linoleic acid,  $m/z$  447.0 > 239.0; linolenic acid,  $m/z$  445.0 > 239.0; arachidonic acid,  $m/z$  471.0 > 239.0; and d33-oleic acid,  $m/z$  482.6 > 242.3. The amounts of fatty acid derivatives were calculated using the ratios of the peak area of the target compounds and of the derivatized stable isotope (d33-oleic acid). MassLynx version 4.1 was used for the system control and data processing.

### **Delipidation of PPAR $\alpha$ -LBD**

The PPAR $\alpha$ -LBD-containing elutes from the cobalt column were precipitated with 9 $\times$  volumes of ethanol for 2 h at room temperature. After centrifugation at 15,000  $g$  for 10 min at 4 °C, the pellet was washed twice using 90% ethanol, and resuspended in 20 mL of 6 M guanidinium hydrochloride in buffer A overnight at 4 °C. For refolding, the sample was directly diluted with 180 mL of buffer A and then concentrated by centrifugation to 3 mL using an Amicon Ultra-15 centrifugal filter (3-kDa cutoff, Merck Millipore). Thereafter, the sample was treated with thrombin and dialyzed with buffer A and was processed as described above.

### **Co-crystallization and soaking**

After examining 192 different buffer conditions using the Crystal Screen and Crystal Screen 2, and Index crystallization kits from Hampton Research at 4 °C and 20 °C (Table S2), we were able to obtain characteristic rod-shaped Wy14643-bound crystals (Figure 1A) in 0.1 M Bis-Tris (pH 6.5)/25% (w/v) polyethylene glycol (PEG) 3,350 (no. 43 buffer in the Index kit) at 4 °C using co-crystallization, which gave a 1.82 Å resolution structure (Crystal no.15 in Table S3). Following this method, co-crystallization was performed in hanging-drop mixtures of 0.5  $\mu$ l PPAR $\alpha$ -LBD (20 mg/ml in buffer A), 0.5  $\mu$ l ligand (200–2,000  $\mu$ M in buffer A), and 1  $\mu$ l reservoir solution (variations of no. 43 buffer: 0.1 M Bis-Tris (pH 6.5), 0.1 M HEPES (pH 7.0 or 7.5), or 0.1 M Tris (pH 8.0 or 8.5) with 25% PEG 3,350) at 4 °C for several weeks. To prepare the PPAR $\alpha$ -LBD/ligand/coactivator crystals, 0.25  $\mu$ l ligand (2 mM in buffer A) and 0.25  $\mu$ l SRC1 pentadecenoyl peptide (LTERHKILHRLQEG synthesized by GenScript) were used instead of the 0.5  $\mu$ l ligand above. For the cross-seeding, Wy14643-bound crystals were crushed using small needles in the reservoir solution. Then, the crushed crystal powder was transferred to another PPAR $\alpha$ -LBD/(another) ligand/reservoir solution using a single streak with a human crown

hair, and this was incubated at 4 °C for several weeks. For soaking, iFA-bound PPAR $\alpha$ -LBD crystals were soaked in a reservoir solution (0.1 M HEPES (pH 7.5), 20% PEG 3,350) containing 0.5–5 mM ligand (final 0.1–1% DMSO) at 4 °C for several weeks. All crystals were briefly soaked in cryoprotection buffer (their respective reservoir solutions with 20% glycerol); afterwards, these were flash-cooled in a stream of liquid nitrogen until X-ray crystallography was conducted.

### **X-ray diffraction data collection and model refinement**

Datasets were collected at four available beamlines (BL-5A, BL-17A, and AR-NE3A at the Photon Factory (Ibaraki, Japan) and BL26B1 at the SPring-8 (Hyogo, Japan)) using synchrotron radiation of 1.0 Å. X-ray diffraction data were also collected using 1.8 Å wavelength X-ray to identify sulfur and chloride atoms in some ligands by analyzing anomalous scattering signals included in X-ray diffraction data (Liu *et al.*, 2012). Although sulfur and chloride atoms have the absorption K-edge at wavelengths longer than 1.8 Å, the anomalous difference Fourier maps exhibited significant signals, which enabled to locate those atoms within the crystal structures. Diffraction data was collected at 0.1° oscillation per frame, and a total of 1,800 frames (180°) were recorded for 1.0 Å X-ray crystallography and 3,600 (360°) frames for 1.8 Å crystallography. Data processing and scaling were carried out using XDS X-ray detector software (Kabsch, 2010) and AIMLESS (Evans & Murshudov, 2013), respectively. Resolution cutoff values ( $R_{\text{merge}} < 0.5$ ,  $R_{\text{pim}} < 0.3$ , and Completeness  $< 0.9$ ) were set by the highest resolution shell. All structures were determined using molecular replacement in PHASER (McCoy *et al.*, 2007) and 1.75 Å resolution structures of synthetic ligand-containing human PPAR $\alpha$ -LBD (PDB: 3V18) (Table S1) as the starting model. Refinement of the structure was performed using iterative cycles of model adjustment in two programs: COOT (Emsley & Cowtan, 2004) and PHENIX (Adams *et al.*, 2010). All collection data and refinement statistics are included in Tables S3 and S4, and essential data are shown in Table 1 with web links to the PDB. *Fo-Fc* omit maps and Feature Enhanced Maps (FEMs) were calculated using PHENIX. The structures were constructed using PyMOL (<http://www.pymol.org>) and USCF Chimera (Pettersen *et al.*, 2004) programs. The interatomic interaction of ligands with PPAR $\alpha$ -LBDs was investigated using LigPlot+ (Laskowski & Swindells, 2011).

### **PPAR $\alpha$ activation (PGC1 $\alpha$ coactivator recruitment) assay**

Activation/inactivation status of PPAR $\alpha$  can be determined using a time-resolved fluorescence resonance energy transfer (TR-FRET) assay, which is used for detecting physical interactions between His-tagged human PPAR $\alpha$ -LBD proteins and biotin-labelled PGC1 $\alpha$  coactivator peptides (biotin-EAEEPSLLKLLLPANTQ synthesized by GenScript) using a LANCE Ultra TR-FRET Assay (PerkinElmer). For the activation assay, 9.5  $\mu$ l of PPAR $\alpha$ -LBD (200 nM in buffer D (10 mM HEPES-HCl (pH7.4), 150 mM NaCl, 0.005% Tween 20, 0.1% fatty acid-free bovine serum albumin)), 0.5  $\mu$ l of 100 $\times$  ligand solution (in DMSO or ethanol), and 5  $\mu$ l of biotin-PGC1 $\alpha$  peptide (4  $\mu$ M) were mixed in a single well of a Corning 384 well low volume white round bottom polystyrene non-binding surface microplate. Then, 5  $\mu$ l of 4 nM Eu-W1024-labelled anti-6 $\times$ His antibody (PerkinElmer)/80 nM ULight-Streptavidin (PerkinElmer) was added to each well and the microplate was incubated in the dark at room temperature for 2 h. FRET signals were detected at one excitation filter (340/12) and two emission filters (615/12 and 665/12) using the Varioskan Flash double monochromator microplate reader (Thermo Fisher Scientific). The parameters for the measurement at 615 nm and 665 nm were an integration time of 200  $\mu$ s and a

delay time of 100  $\mu$ s. The 665 nm emissions were due to ULight-FRET, and the 615 nm emissions were due to Eu-W1024. The 665/615 ratio was calculated and normalized to the negative control reaction using 1% DMSO. For the inactivation assay, graded concentrations of GW9662 were added in the presence of 1–3,000  $\mu$ M of ligand. Nonlinear fitting and calculation of EC<sub>50</sub> and IC<sub>50</sub> were performed using Prism 5 software (GraphPad, San Diego, USA).

#### **Thermostability assay using CD spectroscopy**

Around 10  $\mu$ M of the PPAR $\alpha$ -LBD proteins was incubated with varied concentrations of ligands in buffer A. The CD spectra were monitored within 200–260 nm at increasing temperatures from 30 °C to 70 °C (2 °C/min) with the use of a J-1500 spectropolarimeter (JASCO, Tokyo, Japan), which is equipped with a PTC-510 thermal controller (JASCO). Approximate melting temperatures were obtained by fitting a single-site sigmoidal dose response curve using Prism 5.

#### **Mutagenesis of PPAR $\alpha$ -LBD cDNA**

Site-directed mutagenesis (single amino acid substitutions) was performed using a PrimeSTAR Mutagenesis Basal Kit (Takara Bio). The Cys275Ser (C275S) and C276S but not C278S PPAR $\alpha$ -LBD mutants displayed ligand-dependent activation (coactivator recruitment).

#### **Quantification and Statistical Analysis**

Data are presented as means  $\pm$  SEM ( $n$ : numbers of independent experiments that have 3–4 well replicates) or means  $\pm$  SD for the human samples. Statistical comparison was performed using an unpaired two-tailed Student's  $t$ -test in Prism 5. All  $P$ -values  $<0.05$  denote a significant difference.



## References

- Adams, P.D., Afonine, P.V., Bunkóczi, G., Chen, V.B., Davis, I.W., Echols, N., Headd, J.J., Hung, L.W., Kapral, G.J., Grosse-Kunstleve, R.W., et al. (2010). PHENIX: a comprehensive Python-based system for macromolecular structure solution. *Acta Crystallogr. D Biol. Crystallogr.* *66*, 213–221.
- Bernardes, A., Souza, P.C., Muniz, J.R., Ricci, C.G., Ayers, S.D., Parekh, N.M., Godoy, A.S., Trivella, D.B., Reinach, P., Webb, P., et al. (2013). Molecular mechanism of peroxisome proliferator-activated receptor alpha activation by WY14643: a new mode of ligand recognition and receptor stabilization. *J. Mol. Biol.* *425*, 2878–2893.
- Bligh, E.G., and Dyer, W.J. (1959). A rapid method of total lipid extraction and purification. *Can. J. Biochem. Physiol.* *37*, 911–917.
- Bollinger, J.G., Naika, G.S., Sadilek, M., and Gelb, M.H. (2013). LC/ESI-MS/MS detection of FAs by charge reversal derivatization with more than four orders of magnitude improvement in sensitivity. *J. Lipid Res.* *54*, 3523–3530.
- Capelli, D., Cerchia, C., Montanari, R., Loiodice, F., Tortorella, P., Laghezza, A., Cervoni, L., Pochetti, G., and Lavecchia, A. (2016). Structural basis for PPAR partial or full activation revealed by a novel ligand binding mode. *Sci. Rep.* *6*, 34792.
- Emsley, P., and Cowtan, K. (2004). Coot: model-building tools for molecular graphics. *Acta Crystallogr. D Biol. Crystallogr.* *60*, 2126–2132.
- Evans, P.R., and Murshudov, G.N. (2013). How good are my data and what is the resolution? *Acta Crystallogr. D Biol. Crystallogr.* *69*, 1204–1214.
- Kabsch, W. (2010). XDS. *Acta Crystallogr. D Biol. Crystallogr.* *66*, 125–132.
- Kawasaki, M., Kambe, A., Yamamoto, Y., Arulmozhiraja, S., Ito, S., Nakagawa, Y., Tokiwa, H., Nakano, S., and Shimano, H. (2020). Elucidation of molecular mechanism of a selective PPARalpha modulator, pemafibrate, through combinational approaches of X-ray crystallography, Thermodynamic analysis, and first-principle calculations. *Int. J. Mol. Sci.* *21*, 361.
- Laskowski, R.A., and Swindells, M.B. (2011). LigPlot+: multiple ligand-protein interaction diagrams for drug discovery. *J. Chem. Inf. Model.* *51*, 2778–2786.
- Liu, Q., Dahmane, T., Zhang, Z., Assur, Z., Brasch, J., Shapiro, L., Mancina, F., and Hendrickson, W.A. (2012). Structures from anomalous diffraction of native biological macromolecules. *Science* *336*, 1033–1037.
- McCoy, A.J., Grosse-Kunstleve, R.W., Adams, P.D., Winn, M.D., Storoni, L.C., and Read, R.J. (2007). Phaser crystallographic software. *J. Appl. Crystallogr.* *40*, 658–674.
- Oyama, T., Toyota, K., Waku, T., Hirakawa, Y., Nagasawa, N., Kasuga, J.I., Hashimoto, Y., Miyachi, H., and Morikawa, K. (2009). Adaptability and selectivity of human peroxisome proliferator-activated receptor (PPAR) pan agonists revealed from crystal structures. *Acta Crystallogr. D Biol. Crystallogr.* *65*, 786–795.
- Pettersen, E.F., Goddard, T.D., Huang, C.C., Couch, G.S., Greenblatt, D.M., Meng, E.C., and Ferrin, T.E. (2004). UCSF Chimera--a visualization system for exploratory research and analysis. *J. Comput. Chem.* *25*, 1605–1612.
